# Supplementary material for: Biosynthesis, isolation, and structural characterization of ε-poly-l-lysine produced by Streptomyces sp. DES20
Source: Royal Society of Chemistry journal article supplement (doi:10.1039/c6ra10829f), 2016-01-01
Supplement: c6ra10829f1.pdf [file c6ra10829f1.pdf]

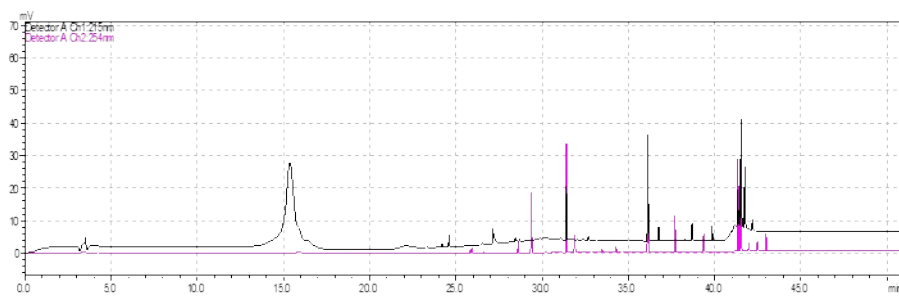

Fig S1 HPLC figure of 5g/L  $\epsilon$ -PL standard

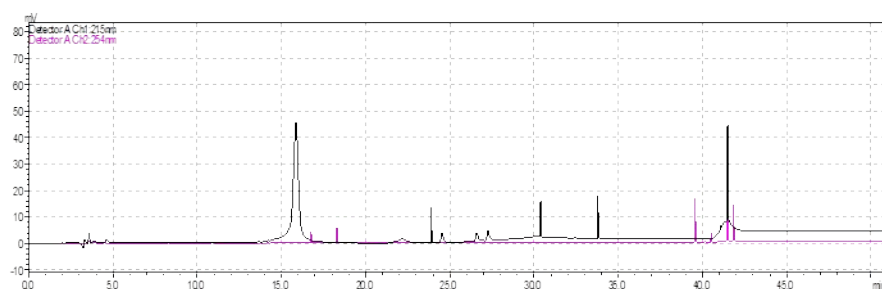

Fig. S2 HPLC figure of 5g/L product isolated from *Streptomyces sp. DES20* with  
hydrochloric acid elution

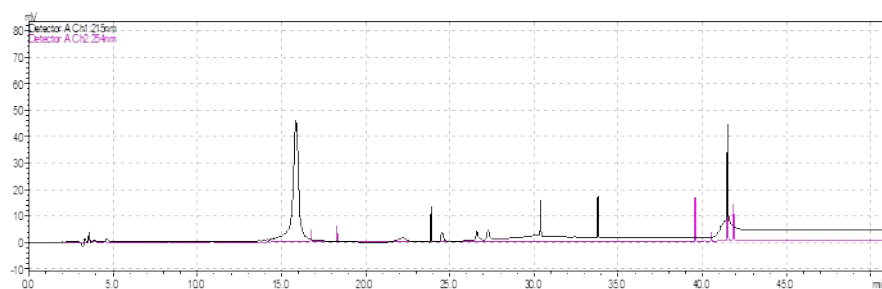

Fig. S3 HPLC figure of 5g/L product isolated from *Streptomyces sp. DES20* with  
 $\text{NH}_4\text{OH}$  elution
